# Supplementary material for: Gene Expression Profile of Human Cytokines in Response to Burkholderia pseudomallei Infection
Source: PubMed Central journal article supplement (PMC5397567; doi:10.1128/msphere.00121-17), 2017-04-19
Supplement: sph002172268st1.pdf [file sph002172268st1.pdf]

**Table S1**

| <b>Gene Target Symbol</b> | <b>Full Name of Gene target</b>                                    |
|---------------------------|--------------------------------------------------------------------|
| ADIPOQ                    | Adiponectin, C1Q and collagen domain containing                    |
| BMP1                      | Bone morphogenetic protein 1                                       |
| BMP2                      | Bone morphogenetic protein 2                                       |
| BMP3                      | Bone morphogenetic protein 3                                       |
| BMP4                      | Bone morphogenetic protein 4                                       |
| BMP5                      | Bone morphogenetic protein 5                                       |
| BMP6                      | Bone morphogenetic protein 6                                       |
| BMP7                      | Bone morphogenetic protein 7                                       |
| CD40LG                    | CD40 ligand                                                        |
| CD70                      | CD70 molecule                                                      |
| CNTF                      | Ciliary neurotrophic factor                                        |
| CSF1                      | Colony stimulating factor 1 (macrophage)                           |
| CSF2                      | Colony stimulating factor 2 (granulocyte-macrophage)               |
| CSF3                      | Colony stimulating factor 3 (granulocyte)                          |
| FAM3B                     | Family with sequence similarity 3, member B                        |
| FASLG                     | Fas ligand (TNF superfamily, member 6)                             |
| FIGF                      | C-fos induced growth factor (vascular endothelial growth factor D) |
| GDF2                      | Growth differentiation factor 2                                    |
| GDF5                      | Growth differentiation factor 5                                    |
| GDF9                      | Growth differentiation factor 9                                    |
| IFNA1                     | Interferon, alpha 1                                                |
| IFNA2                     | Interferon, alpha 2                                                |
| IFNA4                     | Interferon, alpha 4                                                |
| IFNA5                     | Interferon, alpha 5                                                |
| IFNB1                     | Interferon, beta 1, fibroblast                                     |
| IFNG                      | Interferon, gamma                                                  |
| IL10                      | Interleukin 10                                                     |
| IL11                      | Interleukin 11                                                     |
| IL12A                     | Interleukin 12A (cytotoxic lymphocyte maturation factor 1, p35)    |
| IL12B                     | Interleukin 12B (cytotoxic lymphocyte maturation factor 2, p40)    |
| IL13                      | Interleukin 13                                                     |
| IL15                      | Interleukin 15                                                     |
| IL16                      | Interleukin 16                                                     |
| IL17A                     | Interleukin 17A                                                    |
| IL17B                     | Interleukin 17B                                                    |
| IL17C                     | Interleukin 17C                                                    |
| IL18                      | Interleukin 18 (interferon-gamma-inducing factor)                  |
| IL19                      | Interleukin 19                                                     |
| IL1A                      | Interleukin 1, alpha                                               |
| IL1B                      | Interleukin 1, beta                                                |
| IL1RN                     | Interleukin 1 receptor antagonist                                  |

|           |                                                                 |
|-----------|-----------------------------------------------------------------|
| IL2       | Interleukin 2                                                   |
| IL20      | Interleukin 20                                                  |
| IL21      | Interleukin 21                                                  |
| IL22      | Interleukin 22                                                  |
| IL23A     | Interleukin 23, alpha subunit p19                               |
| IL24      | Interleukin 24                                                  |
| IL25      | Interleukin 25                                                  |
| IL27      | Interleukin 27                                                  |
| IL3       | Interleukin 3 (colony-stimulating factor, multiple)             |
| IL4       | Interleukin 4                                                   |
| IL5       | Interleukin 5 (colony-stimulating factor, eosinophil)           |
| IL6       | Interleukin 6 (interferon, beta 2)                              |
| IL7       | Interleukin 7                                                   |
| IL8       | Interleukin 8                                                   |
| IL9       | Interleukin 9                                                   |
| INHA      | Inhibin, alpha                                                  |
| INHBA     | Inhibin, beta A                                                 |
| LEFTY2    | Left-right determination factor 2                               |
| LIF       | Leukemia inhibitory factor (cholinergic differentiation factor) |
| LTA       | Lymphotoxin alpha (TNF superfamily, member 1)                   |
| LTB       | Lymphotoxin beta (TNF superfamily, member 3)                    |
| MSTN      | Myostatin                                                       |
| NODAL     | Nodal homolog (mouse)                                           |
| OSM       | Oncostatin M                                                    |
| PDGFA     | Platelet-derived growth factor alpha polypeptide                |
| SPP1      | Secreted phosphoprotein 1                                       |
| TGFA      | Transforming growth factor, alpha                               |
| TGFB1     | Transforming growth factor, beta 1                              |
| TGFB2     | Transforming growth factor, beta 2                              |
| TGFB3     | Transforming growth factor, beta 3                              |
| THPO      | Thrombopoietin                                                  |
| TNF       | Tumor necrosis factor                                           |
| TNFRSF11B | Tumor necrosis factor receptor superfamily, member 11b          |
| TNFSF10   | Tumor necrosis factor (ligand) superfamily, member 10           |
| TNFSF11   | Tumor necrosis factor (ligand) superfamily, member 11           |
| TNFSF12   | Tumor necrosis factor (ligand) superfamily, member 12           |
| TNFSF13   | Tumor necrosis factor (ligand) superfamily, member 13           |
| TNFSF13B  | Tumor necrosis factor (ligand) superfamily, member 13B          |
| TNFSF14   | Tumor necrosis factor (ligand) superfamily, member 14           |
| TNFSF4    | Tumor necrosis factor (ligand) superfamily, member 4            |
| TNFSF8    | Tumor necrosis factor (ligand) superfamily, member 8            |
| TXLNA     | Taxilin alpha                                                   |
| VEGFA     | Vascular endothelial growth factor A                            |
