# Supplementary material for: Gene Expression Profile of Human Cytokines in Response to Burkholderia pseudomallei Infection
Source: PubMed Central journal article supplement (PMC5397567; doi:10.1128/msphere.00121-17), 2017-04-19
Supplement: sph002172268st2.pdf [file sph002172268st2.pdf]

**Table S2**

| <b>Gene Target</b> | <b>Relative Expression Ratio</b> | <b>Confidence Limit</b> | <b>P-Value</b> |
|--------------------|----------------------------------|-------------------------|----------------|
| ADIPOQ             | 1.993                            | 0.273 , 14.521          | 0.4712         |
| BMP1               | 1.243                            | 0.851 , 1.814           | 0.2432         |
| BMP2               | 2.329                            | 0.901 , 6.018           | 0.0788         |
| BMP3               | 5.305                            | 2.319 , 12.135          | 0.0003         |
| BMP4               | 18.765                           | 1.479 , 238.054         | 0.0271         |
| BMP5               | 3.423                            | 0.594 , 19.741          | 0.1586         |
| BMP6               | 2.776                            | 1.214 , 6.344           | 0.0192         |
| BMP7               | 1.346                            | 0.116 , 15.615          | 0.8062         |
| CD40LG             | 2.275                            | 0.991 , 5.222           | 0.0521         |
| CD70               | 1.667                            | 0.856 , 3.245           | 0.119          |
| CNTF               | 2.222                            | 1.023 , 4.829           | 0.0441         |
| CSF1               | 2.456                            | 1.451 , 4.156           | 0.0017         |
| CSF2               | 2.331                            | 0.602 , 9.033           | 0.2049         |
| CSF3               | 2.178                            | 0.981 , 4.834           | 0.0554         |
| FAM3B              | 3.195                            | 0.692 , 14.766          | 0.1278         |
| FASLG              | 1.939                            | 0.648 , 5.806           | 0.213          |
| FIGF               | 3.912                            | 1.561 , 9.802           | 0.0049         |
| GDF2               | 11.112                           | 1.105 , 111.704         | 0.0421         |
| GDF5               | 2.957                            | 0.762 , 11.476          | 0.1116         |
| GDF9               | 1.258                            | 0.541 , 2.924           | 0.5815         |
| IFNA1              | 4.034                            | 1.358 , 11.984          | 0.014          |
| IFNA2              | 17.777                           | 0.046 , +Inf            | 0.2395         |
| IFNA4              | 5.844                            | 0.894 , 38.217          | 0.0635         |
| IFNA5              | 0.2                              | 0.057 , 0.704           | 0.0152         |
| IFNB1              | 3.206                            | 1.056 , 9.735           | 0.0407         |
| IFNG               | 2.471                            | 0.907 , 6.736           | 0.0742         |
| IL10               | 0.842                            | 0.364 , 1.949           | 0.6761         |
| IL11               | 1.217                            | 0.446 , 3.321           | 0.6885         |
| IL12A              | 1.549                            | 0.644 , 3.725           | 0.2994         |
| IL12B              | 2.497                            | 0.874 , 7.133           | 0.0846         |
| IL13               | 2.529                            | 0.896 , 7.142           | 0.0767         |
| IL15               | 1.271                            | 0.925 , 1.746           | 0.1335         |
| IL16               | 1.896                            | 1.152 , 3.121           | 0.0157         |
| IL17A              | 16.32                            | 3.193 , 83.421          | 0.0017         |
| IL17B              | 2.939                            | 1.486 , 5.811           | 0.003          |
| IL17C              | 1.623                            | 0.793 , 3.322           | 0.1783         |
| IL18               | 0.906                            | 0.572 , 1.435           | 0.6537         |
| IL19               | 1.712                            | 0.700 , 4.188           | 0.2267         |
| IL1A               | 0.39                             | 0.114 , 1.328           | 0.1255         |
| IL1B               | 0.615                            | 0.208 , 1.817           | 0.363          |

|           |       |                |        |
|-----------|-------|----------------|--------|
| IL1RN     | 1.747 | 1.091 , 2.796  | 0.0216 |
| IL2       | 1.387 | 0.458 , 4.204  | 0.5363 |
| IL20      | 2.793 | 0.592 , 13.168 | 0.1781 |
| IL21      | 0.723 | 0.283 , 1.845  | 0.4849 |
| IL22      | 3.022 | 1.207 , 7.565  | 0.0206 |
| IL23A     | 2.792 | 1.329 , 5.866  | 0.0092 |
| IL24      | 2.991 | 1.240 , 7.214  | 0.0173 |
| IL25      | 2.227 | 0.587 , 8.454  | 0.2255 |
| IL27      | 3.089 | 1.203 , 7.932  | 0.0206 |
| IL3       | 9.38  | 1.773 , 49.626 | 0.0107 |
| IL4       | 6.024 | 1.153 , 31.479 | 0.0344 |
| IL5       | 1.105 | 0.445 , 2.740  | 0.8222 |
| IL6       | 1.503 | 0.529 , 4.269  | 0.4203 |
| IL7       | 1.473 | 0.819 , 2.650  | 0.1862 |
| IL8       | 0.567 | 0.225 , 1.432  | 0.2208 |
| IL9       | 2.968 | 0.350 , 25.181 | 0.2747 |
| INHA      | 5.481 | 0.616 , 48.808 | 0.1188 |
| INHBA     | 4.635 | 1.205 , 17.822 | 0.0282 |
| LEFTY2    | 1.606 | 0.650 , 3.971  | 0.2851 |
| LIF       | 1.516 | 0.509 , 4.513  | 0.4405 |
| LTA       | 1.53  | 0.751 , 3.116  | 0.2289 |
| LTB       | 1.841 | 0.905 , 3.744  | 0.0865 |
| MSTN      | 2.135 | 0.502 , 9.086  | 0.2864 |
| NODAL     | 1.275 | 0.702 , 2.317  | 0.403  |
| OSM       | 1.668 | 0.791 , 3.517  | 0.1713 |
| PDGFA     | 2.317 | 1.065 , 5.038  | 0.0357 |
| SPP1      | 1.832 | 0.414 , 8.097  | 0.4081 |
| TGFA      | 1.18  | 0.595 , 2.341  | 0.6225 |
| TGFB1     | 2.006 | 1.374 , 2.931  | 0.0007 |
| TGFB2     | 3.674 | 0.767 , 17.593 | 0.0954 |
| TGFB3     | 1.82  | 0.840 , 3.942  | 0.1205 |
| THPO      | 4.213 | 1.042 , 17.040 | 0.0441 |
| TNF       | 0.91  | 0.260 , 3.187  | 0.8744 |
| TNFRSF11B | 0.956 | 0.186 , 4.901  | 0.9542 |
| TNFSF10   | 1.405 | 0.876 , 2.252  | 0.1513 |
| TNFSF11   | 1.49  | 0.561 , 3.956  | 0.4055 |
| TNFSF12   | 1.211 | 0.799 , 1.836  | 0.3549 |
| TNFSF13   | 1.275 | 0.862 , 1.886  | 0.2144 |
| TNFSF13B  | 1.38  | 0.924 , 2.062  | 0.1114 |
| TNFSF14   | 2.353 | 1.171 , 4.728  | 0.0186 |
| TNFSF4    | 2.349 | 1.167 , 4.728  | 0.0202 |
| TNFSF8    | 1.606 | 1.004 , 2.571  | 0.0484 |
| TXLNA     | 1.216 | 0.817 , 1.809  | 0.3136 |
| VEGFA     | 1.22  | 0.558 , 2.671  | 0.5991 |
