# Supplementary material for: Gene Expression Profile of Human Cytokines in Response to Burkholderia pseudomallei Infection
Source: PubMed Central journal article supplement (PMC5397567; doi:10.1128/msphere.00121-17), 2017-04-19
Supplement: sph002172268st3.pdf [file sph002172268st3.pdf]

**Table S3**

| <b>Gene Target</b> | <b>Relative Expression Ratio</b> | <b>Confidence Limit</b> | <b>P-Value</b> |
|--------------------|----------------------------------|-------------------------|----------------|
| ADIPOQ             | 0.253                            | 0.064 , 1.002           | 0.0503         |
| BMP1               | 1.231                            | 0.748 , 2.027           | 0.3544         |
| BMP2               | 0.465                            | 0.003 , 82.471          | 0.7084         |
| BMP3               | 0.733                            | 0.188 , 2.852           | 0.6055         |
| BMP4               | 1.462                            | 0.078 , 27.489          | 0.7375         |
| BMP5               | 1.196                            | 0.073 , 19.576          | 0.883          |
| BMP6               | 2.946                            | 1.470 , 5.904           | 0.007          |
| BMP7               | 0.026                            | <0.001 , 1.719          | 0.0774         |
| CD40LG             | 0.502                            | 0.336 , 0.752           | 0.002          |
| CD70               | 1.024                            | 0.462 , 2.269           | 0.9409         |
| CNTF               | 1.638                            | 0.712 , 3.771           | 0.235          |
| CSF1               | 1.447                            | 0.806 , 2.597           | 0.1923         |
| CSF2               | 1.342                            | 0.573 , 3.140           | 0.4826         |
| CSF3               | 1.725                            | 0.677 , 4.399           | 0.238          |
| FAM3B              | 0.479                            | 0.151 , 1.520           | 0.1972         |
| FASLG              | 0.836                            | 0.381 , 1.835           | 0.6134         |
| FIGF               | 2.567                            | 0.667 , 9.871           | 0.1475         |
| GDF2               | 40.68                            | 0.484 , +Inf            | 0.0723         |
| GDF5               | 2.33                             | 0.236 , 23.003          | 0.4095         |
| GDF9               | 0.759                            | 0.379 , 1.520           | 0.4227         |
| IFNA1              | 4.293                            | 0.004 , +Inf            | 0.4904         |
| IFNA2              | 60.488                           | 0.152 , +Inf            | 0.1705         |
| IFNA4              | 2.14                             | 0.189 , 24.199          | 0.4548         |
| IFNA5              | 0.189                            | 0.037 , 0.961           | 0.0454         |
| IFNB1              | 0.846                            | 0.298 , 2.400           | 0.7333         |
| IFNG               | 1.437                            | 0.670 , 3.082           | 0.3288         |
| IL10               | 2.257                            | 1.180 , 4.319           | 0.0158         |
| IL11               | 0.411                            | 0.061 , 2.756           | 0.2777         |
| IL12A              | 0.944                            | 0.618 , 1.442           | 0.7774         |
| IL12B              | 5.862                            | 0.943 , 36.417          | 0.0557         |
| IL13               | 1.976                            | 0.727 , 5.374           | 0.1595         |
| IL15               | 1.28                             | 0.781 , 2.096           | 0.2806         |
| IL16               | 0.683                            | 0.527 , 0.887           | 0.0062         |
| IL17A              | 2.382                            | 0.433 , 13.100          | 0.2995         |
| IL17B              | 1.514                            | 0.584 , 3.927           | 0.3515         |
| IL17C              | 1.072                            | 0.559 , 2.058           | 0.8283         |
| IL18               | 0.921                            | 0.690 , 1.229           | 0.5573         |
| IL19               | 1.241                            | 0.198 , 7.785           | 0.7664         |
| IL1A               | 0.911                            | 0.025 , 33.193          | 0.9376         |
| IL1B               | 2.504                            | 1.229 , 5.100           | 0.0135         |
| IL1RN              | 1.62                             | 1.023 , 2.564           | 0.0403         |

|           |       |                |        |
|-----------|-------|----------------|--------|
| IL2       | 0.613 | 0.266 , 1.411  | 0.2255 |
| IL20      | 0.916 | 0.290 , 2.891  | 0.8705 |
| IL21      | 2.009 | 0.609 , 6.630  | 0.2248 |
| IL22      | 2.75  | 0.801 , 9.437  | 0.094  |
| IL23A     | 1.074 | 0.648 , 1.780  | 0.7724 |
| IL24      | 0.855 | 0.472 , 1.549  | 0.5938 |
| IL25      | 0.988 | 0.136 , 7.207  | 0.9891 |
| IL27      | 4.022 | 1.632 , 9.915  | 0.0039 |
| IL3       | 3.533 | 0.149 , 83.708 | 0.3642 |
| IL4       | 1.941 | 0.251 , 15.033 | 0.5041 |
| IL5       | 1.009 | 0.364 , 2.792  | 0.9852 |
| IL6       | 1.844 | 0.951 , 3.574  | 0.0682 |
| IL7       | 0.852 | 0.473 , 1.537  | 0.5777 |
| IL8       | 2.953 | 1.394 , 6.257  | 0.0062 |
| IL9       | 0.91  | <0.001 , +Inf  | 0.9909 |
| INHA      | 3.104 | 0.877 , 10.987 | 0.0747 |
| INHBA     | 6.07  | 2.652 , 13.891 | 0.0002 |
| LEFTY2    | 1.444 | 0.630 , 3.308  | 0.3485 |
| LIF       | 1.099 | 0.464 , 2.605  | 0.8228 |
| LTA       | 0.327 | 0.190 , 0.565  | 0.0003 |
| LTB       | 0.517 | 0.343 , 0.778  | 0.0031 |
| MSTN      | 0.545 | 0.166 , 1.792  | 0.2938 |
| NODAL     | 0.703 | 0.380 , 1.300  | 0.2252 |
| OSM       | 1.207 | 0.609 , 2.390  | 0.5742 |
| PDGFA     | 2.86  | 1.444 , 5.667  | 0.0066 |
| SPP1      | 2.004 | 0.693 , 5.795  | 0.1902 |
| TGFA      | 1.792 | 0.197 , 16.297 | 0.6007 |
| TGFB1     | 1.634 | 1.121 , 2.383  | 0.0126 |
| TGFB2     | 1.723 | 0.766 , 3.876  | 0.1713 |
| TGFB3     | 1.117 | 0.717 , 1.741  | 0.6126 |
| THPO      | 0.701 | 0.134 , 3.658  | 0.6465 |
| TNF       | 2.248 | 1.082 , 4.670  | 0.0315 |
| TNFRSF11B | 0.671 | <0.001 , +Inf  | 0.8718 |
| TNFSF10   | 1.143 | 0.720 , 1.816  | 0.5492 |
| TNFSF11   | 1.003 | 0.058 , 17.428 | 0.9981 |
| TNFSF12   | 0.865 | 0.604 , 1.238  | 0.4144 |
| TNFSF13   | 1.137 | 0.628 , 2.058  | 0.6216 |
| TNFSF13B  | 1.097 | 0.725 , 1.658  | 0.6461 |
| TNFSF14   | 1.086 | 0.554 , 2.129  | 0.7947 |
| TNFSF4    | 1.497 | 0.638 , 3.513  | 0.2914 |
| TNFSF8    | 1.039 | 0.759 , 1.421  | 0.8012 |
| TXLNA     | 0.862 | 0.660 , 1.126  | 0.2604 |
| VEGFA     | 1.218 | 0.113 , 13.076 | 0.8692 |
