# Supplementary material for: Gene Expression Profile of Human Cytokines in Response to Burkholderia pseudomallei Infection
Source: PubMed Central journal article supplement (PMC5397567; doi:10.1128/msphere.00121-17), 2017-04-19
Supplement: sph002172268st4.pdf [file sph002172268st4.pdf]

**Table S4**

| <b>Gene Target</b> | <b>Relative Expression Ratio</b> | <b>Confidence Limit</b> | <b>P-Value</b> |
|--------------------|----------------------------------|-------------------------|----------------|
| ADIPOQ             | 0.127                            | 0.021 , 0.773           | 0.0295         |
| BMP1               | 0.991                            | 0.583 , 1.684           | 0.9702         |
| BMP2               | 0.2                              | 0.001 , 35.999          | 0.443          |
| BMP3               | 0.138                            | 0.035 , 0.542           | 0.0113         |
| BMP4               | 0.078                            | 0.004 , 1.730           | 0.0853         |
| BMP5               | 0.349                            | 0.021 , 5.904           | 0.408          |
| BMP6               | 1.061                            | 0.422 , 2.670           | 0.891          |
| BMP7               | 0.019                            | <0.001 , 1.317          | 0.0609         |
| CD40LG             | 0.221                            | 0.097 , 0.501           | 0.0019         |
| CD70               | 0.614                            | 0.249 , 1.516           | 0.2601         |
| CNTF               | 0.737                            | 0.425 , 1.280           | 0.2377         |
| CSF1               | 0.589                            | 0.321 , 1.082           | 0.0813         |
| CSF2               | 0.576                            | 0.161 , 2.055           | 0.3616         |
| CSF3               | 0.792                            | 0.371 , 1.691           | 0.492          |
| FAM3B              | 0.15                             | 0.034 , 0.656           | 0.0162         |
| FASLG              | 0.431                            | 0.132 , 1.406           | 0.1481         |
| FIGF               | 0.656                            | 0.174 , 2.475           | 0.4768         |
| GDF2               | 3.661                            | 0.050 , 267.877         | 0.3801         |
| GDF5               | 0.788                            | 0.080 , 7.810           | 0.8102         |
| GDF9               | 0.603                            | 0.312 , 1.167           | 0.1215         |
| IFNA1              | 1.064                            | <0.001 , +Inf           | 0.9748         |
| IFNA2              | 3.403                            | 0.004 , +Inf            | 0.7074         |
| IFNA4              | 0.366                            | 0.031 , 4.351           | 0.353          |
| IFNA5              | 0.945                            | 0.238 , 3.755           | 0.9212         |
| IFNB1              | 0.264                            | 0.084 , 0.824           | 0.0261         |
| IFNG               | 0.582                            | 0.215 , 1.576           | 0.261          |
| IL10               | 2.681                            | 1.294 , 5.557           | 0.012          |
| IL11               | 0.338                            | 0.050 , 2.274           | 0.2027         |
| IL12A              | 0.609                            | 0.256 , 1.449           | 0.2338         |
| IL12B              | 2.347                            | 0.372 , 14.797          | 0.3055         |
| IL13               | 0.781                            | 0.265 , 2.308           | 0.6084         |
| IL15               | 1.007                            | 0.614 , 1.650           | 0.9744         |
| IL16               | 0.36                             | 0.222 , 0.586           | 0.0007         |
| IL17A              | 0.146                            | 0.037 , 0.570           | 0.0104         |
| IL17B              | 0.515                            | 0.200 , 1.325           | 0.1423         |
| IL17C              | 0.661                            | 0.381 , 1.146           | 0.1278         |
| IL18               | 1.017                            | 0.646 , 1.600           | 0.9376         |
| IL19               | 0.724                            | 0.087 , 6.042           | 0.6297         |
| IL1A               | 2.336                            | 0.058 , 93.760          | 0.4949         |
| IL1B               | 4.07                             | 1.657 , 9.995           | 0.0062         |

|           |       |                |        |
|-----------|-------|----------------|--------|
| IL1RN     | 0.927 | 0.645 , 1.333  | 0.6585 |
| IL2       | 0.442 | 0.140 , 1.392  | 0.1467 |
| IL20      | 0.328 | 0.065 , 1.647  | 0.1594 |
| IL21      | 2.778 | 0.867 , 8.897  | 0.0777 |
| IL22      | 0.91  | 0.250 , 3.310  | 0.8721 |
| IL23A     | 0.385 | 0.194 , 0.762  | 0.0102 |
| IL24      | 0.286 | 0.130 , 0.632  | 0.005  |
| IL25      | 0.444 | 0.058 , 3.415  | 0.3844 |
| IL27      | 1.302 | 0.595 , 2.851  | 0.4779 |
| IL3       | 0.377 | 0.015 , 9.614  | 0.4467 |
| IL4       | 0.322 | 0.060 , 1.733  | 0.1494 |
| IL5       | 0.913 | 0.305 , 2.732  | 0.858  |
| IL6       | 1.227 | 0.448 , 3.361  | 0.6661 |
| IL7       | 0.579 | 0.333 , 1.006  | 0.0522 |
| IL8       | 5.205 | 2.553 , 10.613 | 0.0003 |
| IL9       | 0.306 | <0.001 , +Inf  | 0.8883 |
| INHA      | 0.566 | 0.081 , 3.941  | 0.5243 |
| INHBA     | 1.309 | 0.353 , 4.851  | 0.6613 |
| LEFTY2    | 0.899 | 0.331 , 2.439  | 0.8204 |
| LIF       | 0.725 | 0.325 , 1.616  | 0.3937 |
| LTA       | 0.214 | 0.113 , 0.404  | 0.0002 |
| LTB       | 0.281 | 0.140 , 0.561  | 0.0019 |
| MSTN      | 0.255 | 0.059 , 1.107  | 0.0656 |
| NODAL     | 0.551 | 0.272 , 1.116  | 0.0906 |
| OSM       | 0.723 | 0.368 , 1.424  | 0.3199 |
| PDGFA     | 1.235 | 0.524 , 2.908  | 0.6036 |
| SPP1      | 1.094 | 0.306 , 3.917  | 0.8796 |
| TGFA      | 1.518 | 0.169 , 13.614 | 0.7061 |
| TGFB1     | 0.815 | 0.615 , 1.078  | 0.1363 |
| TGFB2     | 0.469 | 0.097 , 2.267  | 0.3143 |
| TGFB3     | 0.614 | 0.304 , 1.241  | 0.1539 |
| THPO      | 0.166 | 0.033 , 0.838  | 0.0333 |
| TNF       | 2.471 | 0.738 , 8.273  | 0.1282 |
| TNFRSF11B | 0.702 | <0.001 , +Inf  | 0.8862 |
| TNFSF10   | 0.814 | 0.507 , 1.306  | 0.3611 |
| TNFSF11   | 0.674 | 0.038 , 11.925 | 0.7856 |
| TNFSF12   | 0.714 | 0.519 , 0.982  | 0.04   |
| TNFSF13   | 0.892 | 0.492 , 1.617  | 0.6487 |
| TNFSF13B  | 0.794 | 0.545 , 1.158  | 0.2055 |
| TNFSF14   | 0.462 | 0.219 , 0.974  | 0.0436 |
| TNFSF4    | 0.637 | 0.247 , 1.643  | 0.3155 |
| TNFSF8    | 0.647 | 0.406 , 1.029  | 0.0637 |
| TXLNA     | 0.709 | 0.484 , 1.039  | 0.0736 |
| VEGFA     | 0.998 | 0.092 , 10.780 | 0.9987 |
