# Supplementary material for: Gene Expression Profile of Human Cytokines in Response to Burkholderia pseudomallei Infection
Source: PubMed Central journal article supplement (PMC5397567; doi:10.1128/msphere.00121-17), 2017-04-19
Supplement: sph002172268st5.pdf [file sph002172268st5.pdf]

**Table S5**

| <b>Gene Target</b> | <b>Relative Expression Ratio</b> | <b>Confidence Limit</b> | <b>P-Value</b> |
|--------------------|----------------------------------|-------------------------|----------------|
| ADIPOQ             | 1.521                            | 0.138 , 16.728          | 0.7142         |
| BMP1               | 1.092                            | 0.727 , 1.641           | 0.6561         |
| BMP2               | 1.361                            | 0.476 , 3.887           | 0.5464         |
| BMP3               | 5.335                            | 1.949 , 14.604          | 0.0022         |
| BMP4               | 6.364                            | 0.630 , 64.275          | 0.1012         |
| BMP5               | 3.918                            | 0.474 , 32.358          | 0.1885         |
| BMP6               | 2.913                            | 1.261 , 6.728           | 0.0159         |
| BMP7               | 0.392                            | 0.040 , 3.818           | 0.4009         |
| CD40LG             | 2.283                            | 0.973 , 5.356           | 0.0568         |
| CD70               | 1.623                            | 0.813 , 3.240           | 0.154          |
| CNTF               | 1.89                             | 0.626 , 5.710           | 0.2411         |
| CSF1               | 1.772                            | 1.008 , 3.115           | 0.0473         |
| CSF2               | 1.966                            | 0.466 , 8.284           | 0.3381         |
| CSF3               | 1.57                             | 0.513 , 4.804           | 0.4085         |
| FAM3B              | 2.73                             | 0.568 , 13.129          | 0.1944         |
| FASLG              | 1.54                             | 0.503 , 4.715           | 0.4207         |
| FIGF               | 3.16                             | 1.066 , 9.370           | 0.0389         |
| GDF2               | 6.62                             | 0.420 , 104.364         | 0.1547         |
| GDF5               | 1.768                            | 0.435 , 7.192           | 0.4032         |
| GDF9               | 1.647                            | 0.810 , 3.346           | 0.1565         |
| IFNA1              | 3.559                            | 1.272 , 9.961           | 0.0181         |
| IFNA2              | 7.189                            | 0.016 , +Inf            | 0.3951         |
| IFNA4              | 5.894                            | 0.862 , 40.304          | 0.0674         |
| IFNA5              | 0.175                            | 0.037 , 0.832           | 0.0318         |
| IFNB1              | 4.314                            | 1.088 , 17.096          | 0.0385         |
| IFNG               | 2.019                            | 0.668 , 6.099           | 0.2007         |
| IL10               | 0.497                            | 0.197 , 1.253           | 0.1316         |
| IL11               | 0.942                            | 0.268 , 3.308           | 0.9209         |
| IL12A              | 1.211                            | 0.505 , 2.900           | 0.6421         |
| IL12B              | 2.187                            | 0.707 , 6.764           | 0.1654         |
| IL13               | 2.601                            | 0.822 , 8.232           | 0.0986         |
| IL15               | 1.08                             | 0.780 , 1.495           | 0.6312         |
| IL16               | 1.589                            | 0.959 , 2.633           | 0.0691         |
| IL17A              | 11.695                           | 1.845 , 74.130          | 0.0122         |
| IL17B              | 2.469                            | 1.064 , 5.731           | 0.0365         |
| IL17C              | 1.19                             | 0.600 , 2.358           | 0.6048         |
| IL18               | 0.834                            | 0.527 , 1.318           | 0.4089         |
| IL19               | 0.841                            | 0.291 , 2.431           | 0.7308         |
| IL1A               | 0.199                            | 0.055 , 0.723           | 0.0171         |
| IL1B               | 0.264                            | 0.095 , 0.731           | 0.0134         |

|           |        |                 |        |
|-----------|--------|-----------------|--------|
| IL1RN     | 1.262  | 0.735 , 2.167   | 0.3819 |
| IL2       | 1.075  | 0.312 , 3.705   | 0.9033 |
| IL20      | 2.325  | 0.423 , 12.792  | 0.3132 |
| IL21      | 0.791  | 0.259 , 2.416   | 0.6674 |
| IL22      | 2.753  | 0.924 , 8.200   | 0.0676 |
| IL23A     | 2.232  | 1.042 , 4.780   | 0.0399 |
| IL24      | 2.287  | 0.973 , 5.372   | 0.0569 |
| IL25      | 1.381  | 0.283 , 6.740   | 0.6755 |
| IL27      | 2.646  | 0.754 , 9.287   | 0.1221 |
| IL3       | 11.644 | 0.949 , 142.938 | 0.0542 |
| IL4       | 6.092  | 0.401 , 92.675  | 0.1755 |
| IL5       | 0.982  | 0.356 , 2.707   | 0.9699 |
| IL6       | 1.079  | 0.344 , 3.382   | 0.8907 |
| IL7       | 1.238  | 0.578 , 2.652   | 0.5652 |
| IL8       | 0.317  | 0.114 , 0.881   | 0.0292 |
| IL9       | 3.264  | 0.384 , 27.716  | 0.2382 |
| INH A     | 2.083  | 0.161 , 27.006  | 0.5499 |
| INHBA     | 2.439  | 0.674 , 8.828   | 0.1563 |
| LEFTY2    | 1.261  | 0.502 , 3.163   | 0.6021 |
| LIF       | 0.776  | 0.217 , 2.776   | 0.6813 |
| LTA       | 1.226  | 0.507 , 2.965   | 0.6378 |
| LTB       | 1.641  | 0.788 , 3.414   | 0.1712 |
| MSTN      | 1.534  | 0.305 , 7.731   | 0.5881 |
| NODAL     | 1.031  | 0.557 , 1.908   | 0.9187 |
| OSM       | 0.963  | 0.455 , 2.040   | 0.9182 |
| PDGFA     | 2.433  | 1.059 , 5.593   | 0.0375 |
| SPP1      | 1.061  | 0.216 , 5.220   | 0.9393 |
| TGFA      | 0.881  | 0.396 , 1.957   | 0.7426 |
| TGFB1     | 1.661  | 1.247 , 2.212   | 0.0013 |
| TGFB2     | 5.201  | 1.088 , 24.857  | 0.0405 |
| TGFB3     | 1.579  | 0.673 , 3.701   | 0.2777 |
| THPO      | 1.866  | 0.329 , 10.570  | 0.4536 |
| TNF       | 0.514  | 0.152 , 1.737   | 0.2584 |
| TNFRSF11B | 1.688  | 0.284 , 10.023  | 0.5406 |
| TNFSF10   | 1.285  | 0.779 , 2.120   | 0.3117 |
| TNFSF11   | 1.388  | 0.522 , 3.686   | 0.4908 |
| TNFSF12   | 1.067  | 0.615 , 1.852   | 0.8096 |
| TNFSF13   | 1.092  | 0.781 , 1.526   | 0.5896 |
| TNFSF13B  | 1.06   | 0.725 , 1.550   | 0.7543 |
| TNFSF14   | 1.63   | 0.770 , 3.447   | 0.1902 |
| TNFSF4    | 2.282  | 1.096 , 4.752   | 0.0298 |
| TNFSF8    | 1.401  | 0.870 , 2.255   | 0.1524 |
| TXLNA     | 1.06   | 0.707 , 1.588   | 0.7664 |
| VEGFA     | 0.894  | 0.367 , 2.180   | 0.7952 |
