# Supplementary material for: Gene Expression Profile of Human Cytokines in Response to Burkholderia pseudomallei Infection
Source: PubMed Central journal article supplement (PMC5397567; doi:10.1128/msphere.00121-17), 2017-04-19
Supplement: sph002172268st6.pdf [file sph002172268st6.pdf]

**Table S6**

| Gene Target | diabetic melioidosis vs sepsis |                    |         | diabetic melioidosis vs healthy |                   |         |
|-------------|--------------------------------|--------------------|---------|---------------------------------|-------------------|---------|
|             | Relative Expression Ratio      | Confidence Limit   | P-Value | Relative Expression Ratio       | Confidence Limit  | P-Value |
| ADIPOQ      | 3.116                          | 0.406 ,<br>23.930  | 0.2532  | 0.396                           | 0.090 ,<br>1.736  | 0.1988  |
| BMP1        | 1.243                          | 0.827 , 1.870      | 0.2799  | 1.232                           | 0.739 ,<br>2.054  | 0.3765  |
| BMP2        | 2.52                           | 0.777 , 8.178      | 0.1171  | 0.503                           | 0.003 ,<br>86.911 | 0.7395  |
| BMP3        | 5.953                          | 2.228 ,<br>15.902  | 0.001   | 0.823                           | 0.200 ,<br>3.380  | 0.763   |
| BMP4        | 14.115                         | 0.777 ,<br>256.374 | 0.0699  | 1.1                             | 0.050 ,<br>24.107 | 0.9412  |
| BMP5        | 2.586                          | 0.429 ,<br>15.604  | 0.2833  | 0.904                           | 0.055 ,<br>14.968 | 0.9345  |
| BMP6        | 2.756                          | 1.141 , 6.660      | 0.0267  | 2.925                           | 1.378 ,<br>6.211  | 0.0091  |
| BMP7        | 1.996                          | 0.119 ,<br>33.605  | 0.6164  | 0.038                           | <0.001 ,<br>2.811 | 0.117   |
| CD40LG      | 2.382                          | 1.005 , 5.644      | 0.0489  | 0.526                           | 0.324 ,<br>0.855  | 0.0122  |
| CD70        | 1.743                          | 0.895 , 3.395      | 0.0935  | 1.071                           | 0.483 ,<br>2.372  | 0.8315  |
| CNTF        | 2.878                          | 0.981 , 8.445      | 0.0538  | 2.122                           | 0.698 ,<br>6.453  | 0.1734  |
| CSF1        | 2.97                           | 1.621 , 5.440      | 0.0011  | 1.75                            | 0.915 ,<br>3.347  | 0.0855  |
| CSF2        | 3.331                          | 0.769 ,<br>14.433  | 0.1026  | 1.917                           | 0.671 ,<br>5.478  | 0.2108  |
| CSF3        | 2.766                          | 1.050 , 7.286      | 0.0404  | 2.191                           | 0.749 ,<br>6.412  | 0.1427  |
| FAM3B       | 7.344                          | 1.571 ,<br>34.329  | 0.0144  | 1.101                           | 0.339 ,<br>3.574  | 0.8648  |
| FASLG       | 2.082                          | 0.677 , 6.407      | 0.1828  | 0.898                           | 0.395 ,<br>2.039  | 0.7756  |
| FIGF        | 4.41                           | 1.456 ,<br>13.362  | 0.0108  | 2.894                           | 0.683 ,<br>12.268 | 0.1349  |
| GDF2        | 10.905                         | 1.292 ,<br>92.069  | 0.0318  | 39.919                          | 0.163 , +Inf      | 0.0953  |

|       |       |                   |        |        |                   |        |
|-------|-------|-------------------|--------|--------|-------------------|--------|
| GDF5  | 2.133 | 0.605 , 7.512     | 0.2225 | 1.681  | 0.172 ,<br>16.387 | 0.5958 |
| GDF9  | 1.177 | 0.379 , 3.650     | 0.7678 | 0.71   | 0.251 ,<br>2.011  | 0.4957 |
| IFNA1 | 3.726 | 1.066 ,<br>13.016 | 0.0401 | 3.965  | 0.004 , +Inf      | 0.5133 |
| IFNA2 | 7.982 | 0.016 , +Inf      | 0.3624 | 27.159 | 0.080 , +Inf      | 0.2541 |
| IFNA4 | 4.38  | 0.457 ,<br>42.015 | 0.1803 | 1.604  | 0.118 ,<br>21.807 | 0.6775 |
| IFNA5 | 0.2   | 0.037 , 1.084     | 0.06   | 0.189  | 0.028 ,<br>1.302  | 0.0849 |
| IFNB1 | 4.432 | 1.116 ,<br>17.594 | 0.0355 | 1.169  | 0.313 ,<br>4.368  | 0.8051 |
| IFNG  | 3.282 | 1.100 , 9.788     | 0.0344 | 1.909  | 0.786 ,<br>4.633  | 0.1433 |
| IL10  | 1.307 | 0.542 , 3.148     | 0.5356 | 3.504  | 1.726 ,<br>7.110  | 0.0014 |
| IL11  | 1.371 | 0.471 , 3.993     | 0.5458 | 0.463  | 0.069 ,<br>3.089  | 0.3474 |
| IL12A | 1.566 | 0.643 , 3.811     | 0.2961 | 0.954  | 0.603 ,<br>1.510  | 0.8313 |
| IL12B | 2.89  | 0.869 , 9.614     | 0.0809 | 6.784  | 1.051 ,<br>43.809 | 0.0455 |
| IL13  | 3.716 | 1.102 ,<br>12.526 | 0.0357 | 2.904  | 0.899 ,<br>9.375  | 0.0711 |
| IL15  | 1.366 | 0.956 , 1.953     | 0.0841 | 1.376  | 0.827 ,<br>2.290  | 0.1909 |
| IL16  | 1.858 | 1.104 , 3.125     | 0.0226 | 0.67   | 0.490 ,<br>0.915  | 0.0144 |
| IL17A | 14.8  | 2.526 ,<br>86.706 | 0.0049 | 2.16   | 0.346 ,<br>13.482 | 0.3858 |
| IL17B | 3.363 | 1.736 , 6.513     | 0.0009 | 1.732  | 0.673 ,<br>4.459  | 0.218  |
| IL17C | 1.908 | 0.835 , 4.358     | 0.1196 | 1.261  | 0.581 ,<br>2.735  | 0.5399 |
| IL18  | 0.892 | 0.552 , 1.441     | 0.6213 | 0.907  | 0.654 ,<br>1.257  | 0.537  |
| IL19  | 1.989 | 0.641 , 6.174     | 0.2168 | 1.441  | 0.229 ,<br>9.078  | 0.6437 |
| IL1A  | 0.338 | 0.074 , 1.550     | 0.1529 | 0.791  | 0.027 ,<br>22.920 | 0.8518 |
| IL1B  | 0.817 | 0.251 , 2.660     | 0.7271 | 3.326  | 1.384 ,<br>7.995  | 0.0102 |

|        |        |                    |        |       |                   |        |
|--------|--------|--------------------|--------|-------|-------------------|--------|
| IL1RN  | 1.882  | 1.031 , 3.434      | 0.0403 | 1.745 | 0.964 ,<br>3.157  | 0.0643 |
| IL2    | 1.361  | 0.395 , 4.693      | 0.6072 | 0.602 | 0.219 ,<br>1.656  | 0.3031 |
| IL20   | 2.602  | 0.455 ,<br>14.870  | 0.2653 | 0.854 | 0.207 ,<br>3.517  | 0.815  |
| IL21   | 0.79   | 0.227 , 2.747      | 0.6981 | 2.195 | 0.534 ,<br>9.023  | 0.2553 |
| IL22   | 4.123  | 1.539 ,<br>11.045  | 0.0069 | 3.752 | 1.061 ,<br>13.265 | 0.042  |
| IL23A  | 3.501  | 1.523 , 8.047      | 0.0049 | 1.347 | 0.706 ,<br>2.571  | 0.348  |
| IL24   | 3.692  | 1.521 , 8.959      | 0.0061 | 1.056 | 0.574 ,<br>1.941  | 0.8542 |
| IL25   | 2.847  | 0.720 ,<br>11.248  | 0.128  | 1.263 | 0.171 ,<br>9.327  | 0.7905 |
| IL27   | 3.623  | 1.081 ,<br>12.150  | 0.038  | 4.719 | 1.451 ,<br>15.344 | 0.0125 |
| IL3    | 3.761  | 0.796 ,<br>17.779  | 0.0896 | 1.416 | 0.059 ,<br>33.877 | 0.7898 |
| IL4    | 10.845 | 1.100 ,<br>106.869 | 0.0421 | 3.493 | 0.275 ,<br>44.409 | 0.3148 |
| IL5    | 1.598  | 0.616 , 4.149      | 0.3183 | 1.459 | 0.510 ,<br>4.175  | 0.4431 |
| IL6    | 2.274  | 0.761 , 6.794      | 0.1325 | 2.789 | 1.311 ,<br>5.936  | 0.0104 |
| IL7    | 1.851  | 0.869 , 3.942      | 0.1046 | 1.071 | 0.503 ,<br>2.281  | 0.8504 |
| IL8    | 0.93   | 0.337 , 2.566      | 0.884  | 4.841 | 2.030 ,<br>11.541 | 0.0012 |
| IL9    | 2.111  | 0.234 ,<br>19.026  | 0.4643 | 0.647 | <0.001 ,<br>+Inf  | 0.9584 |
| INHA   | 6.072  | 0.627 ,<br>58.768  | 0.1121 | 3.438 | 0.801 ,<br>14.751 | 0.0883 |
| INHBA  | 5.273  | 1.322 ,<br>21.028  | 0.0214 | 6.905 | 2.802 ,<br>17.014 | 0.0003 |
| LEFTY2 | 1.904  | 0.730 , 4.969      | 0.176  | 1.712 | 0.707 ,<br>4.142  | 0.2104 |
| LIF    | 1.694  | 0.479 , 5.994      | 0.3966 | 1.228 | 0.412 ,<br>3.659  | 0.6944 |
| LTA    | 1.648  | 0.695 , 3.910      | 0.2446 | 0.353 | 0.167 ,<br>0.744  | 0.0087 |

|           |       |                   |        |       |                   |        |
|-----------|-------|-------------------|--------|-------|-------------------|--------|
| LTB       | 1.9   | 0.915 , 3.944     | 0.0809 | 0.533 | 0.339 ,<br>0.840  | 0.0092 |
| MSTN      | 2.272 | 0.432 ,<br>11.949 | 0.3166 | 0.58  | 0.136 ,<br>2.474  | 0.4396 |
| NODAL     | 1.539 | 0.805 , 2.940     | 0.1803 | 0.848 | 0.440 ,<br>1.633  | 0.5905 |
| OSM       | 2.241 | 0.987 , 5.085     | 0.0534 | 1.621 | 0.754 ,<br>3.483  | 0.2023 |
| PDGFA     | 2.483 | 1.066 , 5.786     | 0.0364 | 3.065 | 1.439 ,<br>6.530  | 0.0068 |
| SPP1      | 1.78  | 0.282 ,<br>11.239 | 0.5237 | 1.948 | 0.408 ,<br>9.310  | 0.3799 |
| TGFA      | 1.775 | 0.780 , 4.039     | 0.1599 | 2.694 | 0.285 ,<br>25.451 | 0.3826 |
| TGFB1     | 2.103 | 1.369 , 3.231     | 0.0016 | 1.713 | 1.117 ,<br>2.627  | 0.0162 |
| TGFB2     | 4.582 | 0.902 ,<br>23.265 | 0.0643 | 2.149 | 0.833 ,<br>5.547  | 0.1068 |
| TGFB3     | 1.983 | 0.858 , 4.580     | 0.1038 | 1.217 | 0.687 ,<br>2.155  | 0.4799 |
| THPO      | 6.014 | 1.503 ,<br>24.063 | 0.0137 | 1.001 | 0.193 ,<br>5.193  | 0.9991 |
| TNF       | 0.891 | 0.242 , 3.285     | 0.8547 | 2.202 | 0.953 ,<br>5.087  | 0.0632 |
| TNFRSF11B | 2.097 | 0.456 , 9.653     | 0.3166 | 1.473 | <0.001 ,<br>+Inf  | 0.8751 |
| TNFSF10   | 1.242 | 0.697 , 2.213     | 0.446  | 1.011 | 0.573 ,<br>1.783  | 0.9676 |
| TNFSF11   | 2.147 | 0.730 , 6.315     | 0.1559 | 1.446 | 0.081 ,<br>25.972 | 0.8005 |
| TNFSF12   | 1.077 | 0.631 , 1.837     | 0.7777 | 0.769 | 0.468 ,<br>1.262  | 0.2807 |
| TNFSF13   | 1.443 | 0.918 , 2.267     | 0.1067 | 1.287 | 0.695 ,<br>2.381  | 0.3752 |
| TNFSF13B  | 1.327 | 0.833 , 2.116     | 0.2222 | 1.055 | 0.656 ,<br>1.696  | 0.8173 |
| TNFSF14   | 2.234 | 1.012 , 4.931     | 0.047  | 1.031 | 0.480 ,<br>2.217  | 0.9333 |
| TNFSF4    | 2.61  | 1.261 , 5.401     | 0.0129 | 1.663 | 0.703 ,<br>3.937  | 0.2057 |
| TNFSF8    | 1.824 | 1.081 , 3.079     | 0.0264 | 1.18  | 0.792 ,<br>1.757  | 0.3961 |

|       |       |               |        |       |                   |        |
|-------|-------|---------------|--------|-------|-------------------|--------|
| TXLNA | 1.246 | 0.826 , 1.878 | 0.276  | 0.883 | 0.661 ,<br>1.180  | 0.3807 |
| VEGFA | 1.906 | 0.764 , 4.755 | 0.1555 | 1.902 | 0.170 ,<br>21.291 | 0.598  |
