# Supplementary material for: Gene Expression Profile of Human Cytokines in Response to Burkholderia pseudomallei Infection
Source: PubMed Central journal article supplement (PMC5397567; doi:10.1128/msphere.00121-17), 2017-04-19
Supplement: sph002172268st7.pdf [file sph002172268st7.pdf]

**Table S7**

| melioidosis fever $\leq$ 15 days vs sepsis |                           |                  |         | melioidosis fever $>$ 15 days vs sepsis |                  |         |
|--------------------------------------------|---------------------------|------------------|---------|-----------------------------------------|------------------|---------|
| Gene Target                                | Relative Expression Ratio | Confidence Limit | P-Value | Relative Expression Ratio               | Confidence Limit | P-Value |
| ADIPOQ                                     | 0.369                     | 0.019 , 7.052    | 0.4256  | 3.038                                   | 0.384 , 24.000   | 0.271   |
| BMP1                                       | 0.903                     | 0.598 , 1.363    | 0.6009  | 1.341                                   | 0.903 , 1.991    | 0.1378  |
| BMP2                                       | 0.543                     | 0.282 , 1.045    | 0.0641  | 3.011                                   | 1.099 , 8.247    | 0.0333  |
| BMP3                                       | 2.267                     | 0.463 , 11.112   | 0.2541  | 6.494                                   | 2.715 , 15.538   | 0.0002  |
| BMP4                                       | 4.117                     | 0.428 , 39.595   | 0.1721  | 25.416                                  | 1.682 , 383.961  | 0.0231  |
| BMP5                                       | 4.304                     | 0.376 , 49.275   | 0.1862  | 3.259                                   | 0.478 , 22.208   | 0.2141  |
| BMP6                                       | 2.639                     | 0.929 , 7.500    | 0.0657  | 2.809                                   | 1.204 , 6.552    | 0.0201  |
| BMP7                                       | 0.666                     | 0.068 , 6.529    | 0.6871  | 1.504                                   | 0.099 , 22.853   | 0.7606  |
| CD40LG                                     | 2.286                     | 0.905 , 5.774    | 0.0759  | 2.272                                   | 0.972 , 5.310    | 0.057   |
| CD70                                       | 1.407                     | 0.647 , 3.064    | 0.3596  | 1.743                                   | 0.893 , 3.402    | 0.0946  |
| CNTF                                       | 0.898                     | 0.452 , 1.783    | 0.7168  | 2.758                                   | 1.098 , 6.927    | 0.0323  |
| CSF1                                       | 1.013                     | 0.383 , 2.681    | 0.9749  | 3.064                                   | 1.820 , 5.158    | 0.0002  |
| CSF2                                       | 0.817                     | 0.126 , 5.287    | 0.8138  | 2.992                                   | 0.741 , 12.087   | 0.1167  |
| CSF3                                       | 0.591                     | 0.097 , 3.613    | 0.4793  | 2.971                                   | 1.253 , 7.041    | 0.0154  |
| FAM3B                                      | 1.51                      | 0.312 , 7.300    | 0.5757  | 3.812                                   | 0.745 , 19.495   | 0.1026  |
| FASLG                                      | 1.202                     | 0.318 , 4.551    | 0.7684  | 2.173                                   | 0.717 , 6.581    | 0.1539  |
| FIGF                                       | 1.765                     | 0.727 , 4.290    | 0.1867  | 4.728                                   | 1.681 , 13.300   | 0.0046  |
| GDF2                                       |                           |                  |         | 11.112                                  | 1.105 , 111.704  | 0.0421  |

|       |       |                    |        |        |                    |        |
|-------|-------|--------------------|--------|--------|--------------------|--------|
| GDF5  | 0.45  | 0.149 , 1.359      | 0.1384 | 4.427  | 1.068 ,<br>18.350  | 0.0412 |
| GDF9  | 1.451 | 0.527 , 3.995      | 0.426  | 1.212  | 0.462 ,<br>3.181   | 0.6858 |
| IFNA1 | 1.834 | 0.537 , 6.266      | 0.2902 | 4.722  | 1.440 ,<br>15.482  | 0.0123 |
| IFNA2 |       |                    |        | 17.777 | 0.046 , +Inf       | 0.2395 |
| IFNA4 | 3.704 | 0.070 ,<br>196.370 | 0.3912 | 6.934  | 0.858 ,<br>56.016  | 0.0667 |
| IFNA5 | 0.082 | 0.004 , 1.892      | 0.0926 | 0.313  | 0.075 ,<br>1.313   | 0.1021 |
| IFNB1 | 1.322 | 0.452 , 3.866      | 0.5819 | 4.001  | 1.196 ,<br>13.384  | 0.0262 |
| IFNG  | 0.833 | 0.214 , 3.247      | 0.7697 | 3.202  | 1.149 ,<br>8.925   | 0.0282 |
| IL10  | 0.209 | 0.030 , 1.445      | 0.0934 | 1.173  | 0.518 ,<br>2.655   | 0.6897 |
| IL11  | 0.854 | 0.162 , 4.491      | 0.8215 | 1.322  | 0.447 ,<br>3.912   | 0.5987 |
| IL12A | 0.953 | 0.353 , 2.576      | 0.9188 | 1.749  | 0.719 ,<br>4.254   | 0.1976 |
| IL12B | 1.198 | 0.311 , 4.612      | 0.7685 | 2.974  | 0.952 ,<br>9.295   | 0.0601 |
| IL13  | 1.486 | 0.346 , 6.387      | 0.5457 | 2.909  | 0.938 ,<br>9.017   | 0.063  |
| IL15  | 0.72  | 0.548 , 0.946      | 0.0219 | 1.455  | 1.044 ,<br>2.027   | 0.0281 |
| IL16  | 1.495 | 0.788 , 2.836      | 0.195  | 2.006  | 1.208 ,<br>3.333   | 0.0105 |
| IL17A | 3.148 | 0.471 ,<br>21.029  | 0.1867 | 27.078 | 3.920 ,<br>187.046 | 0.0022 |
| IL17B | 2.004 | 0.874 , 4.596      | 0.0903 | 3.219  | 1.499 ,<br>6.915   | 0.004  |
| IL17C | 1.691 | 0.801 , 3.572      | 0.147  | 1.607  | 0.701 ,<br>3.686   | 0.2519 |
| IL18  | 0.914 | 0.491 , 1.700      | 0.7536 | 0.904  | 0.563 ,<br>1.453   | 0.6596 |
| IL19  | 0.793 | 0.240 , 2.618      | 0.6272 | 2.103  | 0.720 ,<br>6.145   | 0.1626 |
| IL1A  | 0.286 | 0.110 , 0.745      | 0.0163 | 0.419  | 0.104 ,<br>1.691   | 0.21   |

|        |       |                   |        |        |                    |        |
|--------|-------|-------------------|--------|--------|--------------------|--------|
| IL1B   | 0.087 | 0.029 , 0.261     | 0.0004 | 0.981  | 0.330 ,<br>2.920   | 0.9717 |
| IL1RN  | 0.544 | 0.259 , 1.141     | 0.0905 | 2.306  | 1.455 ,<br>3.656   | 0.0009 |
| IL2    | 1.622 | 0.515 , 5.113     | 0.3762 | 1.321  | 0.407 ,<br>4.287   | 0.6237 |
| IL20   | 1.622 | 0.169 ,<br>15.597 | 0.6414 | 3.31   | 0.676 ,<br>16.207  | 0.1297 |
| IL21   | 0.357 | 0.128 , 0.995     | 0.049  | 0.871  | 0.300 ,<br>2.527   | 0.7918 |
| IL22   | 1.081 | 0.252 , 4.631     | 0.9046 | 3.86   | 1.504 ,<br>9.905   | 0.0071 |
| IL23A  | 1.31  | 0.656 , 2.618     | 0.4122 | 3.344  | 1.534 ,<br>7.288   | 0.004  |
| IL24   | 2.045 | 0.811 , 5.154     | 0.1182 | 3.274  | 1.273 ,<br>8.421   | 0.0161 |
| IL25   | 0.813 | 0.103 , 6.420     | 0.8163 | 2.865  | 0.700 ,<br>11.718  | 0.1354 |
| IL27   | 0.846 | 0.261 , 2.743     | 0.7497 | 4.204  | 1.490 ,<br>11.861  | 0.0083 |
| IL3    | 3.914 | <0.001 , +Inf     | 0.4223 | 10.54  | 1.691 ,<br>65.698  | 0.0143 |
| IL4    | 0.673 | 0.043 ,<br>10.599 | 0.7223 | 11.479 | 1.666 ,<br>79.101  | 0.0159 |
| IL5    | 0.975 | 0.271 , 3.509     | 0.9647 | 1.142  | 0.428 ,<br>3.044   | 0.7828 |
| IL6    | 0.358 | 0.133 , 0.966     | 0.0437 | 2.114  | 0.739 ,<br>6.050   | 0.1508 |
| IL7    | 0.879 | 0.418 , 1.848     | 0.6952 | 1.688  | 0.871 ,<br>3.270   | 0.1154 |
| IL8    | 0.1   | 0.026 , 0.381     | 0.0047 | 0.858  | 0.333 ,<br>2.213   | 0.7431 |
| IL9    | 3.524 | 0.401 ,<br>30.949 | 0.2216 | 2.626  | 0.298 ,<br>23.137  | 0.3425 |
| INHA   | 0.303 | 0.027 , 3.464     | 0.2965 | 13.059 | 1.647 ,<br>103.563 | 0.0188 |
| INHBA  | 1.363 | 0.340 , 5.466     | 0.6376 | 6.396  | 1.608 ,<br>25.439  | 0.0115 |
| LEFTY2 | 1.385 | 0.486 , 3.951     | 0.511  | 1.67   | 0.639 ,<br>4.366   | 0.2791 |
| LIF    | 0.112 | 0.028 , 0.458     | 0.0103 | 2.34   | 0.814 ,<br>6.726   | 0.1097 |

|           |       |                   |        |       |                   |        |
|-----------|-------|-------------------|--------|-------|-------------------|--------|
| LTA       | 1.061 | 0.572 , 1.971     | 0.8372 | 1.669 | 0.765 ,<br>3.639  | 0.1884 |
| LTB       | 1.354 | 0.667 , 2.747     | 0.3698 | 1.981 | 0.950 ,<br>4.131  | 0.0662 |
| MSTN      | 1.293 | 0.114 ,<br>14.656 | 0.8111 | 2.454 | 0.539 ,<br>11.173 | 0.2313 |
| NODAL     | 0.937 | 0.439 , 2.000     | 0.8529 | 1.389 | 0.741 ,<br>2.603  | 0.2876 |
| OSM       | 0.308 | 0.128 , 0.743     | 0.0141 | 2.493 | 1.201 ,<br>5.173  | 0.0162 |
| PDGFA     | 2.017 | 0.663 , 6.135     | 0.1886 | 2.395 | 1.072 ,<br>5.352  | 0.0349 |
| SPP1      | 1.325 | 0.219 , 8.022     | 0.7353 | 1.994 | 0.390 ,<br>10.212 | 0.3923 |
| TGFA      | 0.446 | 0.170 , 1.172     | 0.0866 | 1.484 | 0.719 ,<br>3.063  | 0.2719 |
| TGFB1     | 1.37  | 0.902 , 2.081     | 0.1189 | 2.197 | 1.416 ,<br>3.408  | 0.001  |
| TGFB2     | 5.381 | 1.008 ,<br>28.733 | 0.0491 | 3.339 | 0.678 ,<br>16.456 | 0.1266 |
| TGFB3     | 1.264 | 0.563 , 2.840     | 0.5425 | 1.985 | 0.879 ,<br>4.482  | 0.0943 |
| THPO      | 1.522 | 0.540 , 4.290     | 0.3886 | 5.241 | 1.102 ,<br>24.928 | 0.0384 |
| TNF       | 0.225 | 0.053 , 0.943     | 0.0425 | 1.269 | 0.358 ,<br>4.500  | 0.6942 |
| TNFRSF11B | 1.231 | 0.080 ,<br>18.920 | 0.8546 | 0.884 | 0.142 ,<br>5.504  | 0.8891 |
| TNFSF10   | 0.886 | 0.313 , 2.507     | 0.7809 | 1.568 | 0.958 ,<br>2.566  | 0.0721 |
| TNFSF11   | 1.133 | 0.474 , 2.710     | 0.7593 | 1.601 | 0.541 ,<br>4.739  | 0.3795 |
| TNFSF12   | 1.342 | 0.962 , 1.872     | 0.0789 | 1.182 | 0.732 ,<br>1.910  | 0.4815 |
| TNFSF13   | 0.964 | 0.671 , 1.385     | 0.8292 | 1.372 | 0.879 ,<br>2.142  | 0.1562 |
| TNFSF13B  | 0.657 | 0.310 , 1.393     | 0.2163 | 1.647 | 1.092 ,<br>2.485  | 0.0191 |
| TNFSF14   | 1.831 | 0.827 , 4.056     | 0.1224 | 2.497 | 1.173 ,<br>5.315  | 0.0196 |
| TNFSF4    | 1.565 | 0.665 , 3.680     | 0.2757 | 2.588 | 1.265 ,<br>5.293  | 0.0125 |

|        |       |               |        |       |                  |        |
|--------|-------|---------------|--------|-------|------------------|--------|
| TNFSF8 | 1.5   | 0.872 , 2.580 | 0.1295 | 1.634 | 0.999 ,<br>2.672 | 0.0503 |
| TXLNA  | 1.001 | 0.564 , 1.779 | 0.9958 | 1.274 | 0.843 ,<br>1.923 | 0.2345 |
| VEGFA  | 0.573 | 0.145 , 2.269 | 0.3477 | 1.443 | 0.634 ,<br>3.288 | 0.3621 |
