# Supplementary material for: Gene Expression Profile of Human Cytokines in Response to Burkholderia pseudomallei Infection
Source: PubMed Central journal article supplement (PMC5397567; doi:10.1128/msphere.00121-17), 2017-04-19
Supplement: sph002172268st8.pdf [file sph002172268st8.pdf]

**Table S8**

| melioidosis $\leq$ 15 days antibiotics vs sepsis |                           |                  |         | melioidosis $>$ 15 days antibiotics vs sepsis |                  |         |
|--------------------------------------------------|---------------------------|------------------|---------|-----------------------------------------------|------------------|---------|
| Gene Target                                      | Relative Expression Ratio | Confidence Limit | P-Value | Relative Expression Ratio                     | Confidence Limit | P-Value |
| ADIPOQ                                           | 2.651                     | 0.328 , 21.428   | 0.3348  | 1.223                                         | 0.029 , 51.984   | 0.9008  |
| BMP1                                             | 1.143                     | 0.753 , 1.735    | 0.5116  | 1.489                                         | 0.881 , 2.516    | 0.1259  |
| BMP2                                             | 1.805                     | 0.504 , 6.459    | 0.3348  | 3.491                                         | 0.662 , 18.400   | 0.1216  |
| BMP3                                             | 3.295                     | 1.352 , 8.027    | 0.011   | 9.193                                         | 1.895 , 44.606   | 0.0109  |
| BMP4                                             | 7.247                     | 0.588 , 89.374   | 0.1095  | 48.057                                        | 0.232 , +Inf     | 0.1176  |
| BMP5                                             | 3.709                     | 0.421 , 32.686   | 0.2201  | 3.484                                         | 0.269 , 45.193   | 0.2995  |
| BMP6                                             | 2.708                     | 1.133 , 6.469    | 0.0275  | 3.683                                         | 1.285 , 10.551   | 0.0184  |
| BMP7                                             | 0.765                     | 0.089 , 6.534    | 0.7957  | 0.299                                         | 0.016 , 5.444    | 0.3831  |
| CD40LG                                           | 2.09                      | 0.878 , 4.974    | 0.0901  | 1.917                                         | 0.739 , 4.973    | 0.1669  |
| CD70                                             | 1.614                     | 0.828 , 3.149    | 0.1427  | 1.354                                         | 0.645 , 2.838    | 0.3963  |
| CNTF                                             | 1.512                     | 0.787 , 2.904    | 0.2004  | 5.17                                          | 0.480 , 55.737   | 0.1473  |
| CSF1                                             | 2.027                     | 1.120 , 3.669    | 0.0217  | 3.423                                         | 1.163 , 10.075   | 0.0301  |
| CSF2                                             | 1.338                     | 0.362 , 4.945    | 0.6397  | 4.569                                         | 0.425 , 49.169   | 0.1877  |
| CSF3                                             | 1.484                     | 0.608 , 3.624    | 0.3644  | 2.593                                         | 0.306 , 21.979   | 0.3305  |
| FAM3B                                            | 2.314                     | 0.540 , 9.920    | 0.2353  | 8.173                                         | 0.835 , 80.009   | 0.0676  |
| FASLG                                            | 1.485                     | 0.477 , 4.628    | 0.468   | 2.087                                         | 0.589 , 7.394    | 0.2353  |
| FIGF                                             | 2.656                     | 1.062 , 6.646    | 0.0379  | 4.345                                         | 0.471 , 40.037   | 0.1668  |
| GDF2                                             | 9.652                     | 1.240 , 75.129   | 0.0338  | 3.663                                         | $<$ 0.001 , +Inf | 0.7103  |

|       |        |                    |        |        |                   |        |
|-------|--------|--------------------|--------|--------|-------------------|--------|
| GDF5  | 2.826  | 0.391 , 20.437     | 0.2763 | 2.09   | 0.569 ,<br>7.682  | 0.2447 |
| GDF9  | 0.897  | 0.270 , 2.974      | 0.8507 | 2.363  | 0.805 ,<br>6.934  | 0.1066 |
| IFNA1 | 3.681  | 1.112 , 12.181     | 0.0343 | 3.803  | 0.281 ,<br>51.495 | 0.268  |
| IFNA2 | 24.904 | 0.037 , +Inf       | 0.2574 | 59.852 | 0.076 , +Inf      | 0.2168 |
| IFNA4 | 4.095  | 0.569 , 29.492     | 0.1469 | 1.656  | <0.001 ,<br>+Inf  | 0.7626 |
| IFNA5 | 0.123  | 0.023 , 0.648      | 0.0183 | 0.529  | 0.060 ,<br>4.630  | 0.4745 |
| IFNB1 | 2.001  | 0.706 , 5.673      | 0.1772 | 2.622  | 0.621 ,<br>11.064 | 0.1701 |
| IFNG  | 1.588  | 0.553 , 4.560      | 0.37   | 3.502  | 0.789 ,<br>15.532 | 0.0923 |
| IL10  | 0.578  | 0.209 , 1.602      | 0.277  | 1.662  | 0.435 ,<br>6.355  | 0.4227 |
| IL11  | 1.734  | 0.607 , 4.950      | 0.2844 | 1.075  | 0.174 ,<br>6.664  | 0.93   |
| IL12A | 1.526  | 0.608 , 3.832      | 0.3434 | 1.554  | 0.516 ,<br>4.680  | 0.4071 |
| IL12B | 1.993  | 0.684 , 5.806      | 0.1939 | 2.743  | 0.314 ,<br>23.969 | 0.3218 |
| IL13  | 1.739  | 0.648 , 4.662      | 0.2479 | 2.261  | 0.248 ,<br>20.597 | 0.4185 |
| IL15  | 0.999  | 0.716 , 1.393      | 0.9932 | 1.642  | 0.894 ,<br>3.017  | 0.0989 |
| IL16  | 1.709  | 0.994 , 2.938      | 0.0522 | 1.878  | 1.074 ,<br>3.284  | 0.0296 |
| IL17A | 33.758 | 3.476 ,<br>327.839 | 0.0052 | 5.645  | 1.322 ,<br>24.105 | 0.0253 |
| IL17B | 2.353  | 0.964 , 5.744      | 0.0592 | 3.344  | 0.982 ,<br>11.385 | 0.0528 |
| IL17C | 1.659  | 0.696 , 3.957      | 0.2383 | 1.559  | 0.358 ,<br>6.781  | 0.5096 |
| IL18  | 0.836  | 0.509 , 1.374      | 0.4585 | 1.137  | 0.616 ,<br>2.099  | 0.6621 |
| IL19  | 1.058  | 0.333 , 3.361      | 0.9172 | 2.227  | 0.363 ,<br>13.647 | 0.3293 |
| IL1A  | 0.265  | 0.050 , 1.388      | 0.1075 | 0.492  | 0.059 ,<br>4.105  | 0.4665 |

|        |       |                |        |        |                 |        |
|--------|-------|----------------|--------|--------|-----------------|--------|
| IL1B   | 0.474 | 0.134 , 1.674  | 0.2329 | 1.205  | 0.205 , 7.087   | 0.8215 |
| IL1RN  | 1.164 | 0.674 , 2.011  | 0.5679 | 3.449  | 1.354 , 8.788   | 0.0154 |
| IL2    | 1.644 | 0.529 , 5.107  | 0.3639 | 0.507  | 0.099 , 2.594   | 0.3702 |
| IL20   | 2.192 | 0.450 , 10.676 | 0.3077 | 7.814  | 0.614 , 99.378  | 0.0994 |
| IL21   | 0.48  | 0.179 , 1.290  | 0.1377 | 0.717  | 0.074 , 6.976   | 0.7408 |
| IL22   | 2.048 | 0.802 , 5.232  | 0.1262 | 3.57   | 0.814 , 15.655  | 0.0851 |
| IL23A  | 2.286 | 1.100 , 4.751  | 0.029  | 4.102  | 1.011 , 16.646  | 0.0486 |
| IL24   | 2.758 | 1.142 , 6.659  | 0.0265 | 3.964  | 1.098 , 14.318  | 0.0375 |
| IL25   | 2.214 | 0.535 , 9.168  | 0.2558 | 3.075  | 0.248 , 38.119  | 0.3317 |
| IL27   | 1.763 | 0.730 , 4.255  | 0.1957 | 8.383  | 0.786 , 89.362  | 0.0721 |
| IL3    | 5.41  | 0.945 , 30.966 | 0.0568 | 3.52   | 0.447 , 27.756  | 0.1894 |
| IL4    | 1.563 | 0.459 , 5.319  | 0.4515 | 63.393 | 0.527 , +Inf    | 0.0788 |
| IL5    | 1.006 | 0.415 , 2.438  | 0.9887 | 0.914  | 0.138 , 6.060   | 0.9156 |
| IL6    | 1.046 | 0.333 , 3.290  | 0.9353 | 2.89   | 0.714 , 11.699  | 0.1263 |
| IL7    | 1.058 | 0.552 , 2.027  | 0.857  | 2.689  | 0.789 , 9.161   | 0.1007 |
| IL8    | 0.386 | 0.125 , 1.194  | 0.0942 | 1.83   | 0.478 , 7.009   | 0.3441 |
| IL9    | 3.103 | 0.359 , 26.849 | 0.2645 | 1.967  | 0.217 , 17.856  | 0.4994 |
| INHA   | 3.33  | 0.281 , 39.524 | 0.3179 | 13.205 | 0.630 , 276.872 | 0.0859 |
| INHBA  | 4.307 | 1.033 , 17.951 | 0.0455 | 5.869  | 0.886 , 38.868  | 0.0642 |
| LEFTY2 | 1.968 | 0.768 , 5.045  | 0.148  | 1.404  | 0.303 , 6.497   | 0.6337 |
| LIF    | 1.274 | 0.265 , 6.124  | 0.7457 | 2.179  | 0.274 , 17.345  | 0.4126 |

|           |       |                |        |       |                    |        |
|-----------|-------|----------------|--------|-------|--------------------|--------|
| LTA       | 1.665 | 0.809 , 3.426  | 0.1559 | 1.08  | 0.237 ,<br>4.926   | 0.9121 |
| LTB       | 1.829 | 0.868 , 3.854  | 0.1056 | 1.827 | 0.664 ,<br>5.024   | 0.2226 |
| MSTN      | 2.348 | 0.550 , 10.016 | 0.2314 | 3.065 | 0.192 ,<br>48.811  | 0.3847 |
| NODAL     | 1.229 | 0.674 , 2.244  | 0.478  | 1.037 | 0.347 ,<br>3.103   | 0.9406 |
| OSM       | 1.232 | 0.472 , 3.218  | 0.6552 | 2.514 | 0.750 ,<br>8.424   | 0.1209 |
| PDGFA     | 2.363 | 1.010 , 5.530  | 0.0476 | 3.278 | 1.224 ,<br>8.781   | 0.0213 |
| SPP1      | 2.185 | 0.512 , 9.330  | 0.2738 | 3.989 | 0.101 ,<br>158.118 | 0.3983 |
| TGFA      | 0.778 | 0.343 , 1.763  | 0.5238 | 2.159 | 0.616 ,<br>7.574   | 0.1959 |
| TGFB1     | 1.873 | 1.165 , 3.010  | 0.0124 | 2.588 | 1.042 ,<br>6.425   | 0.0425 |
| TGFB2     | 3.463 | 0.715 , 16.778 | 0.1123 | 7.729 | 1.516 ,<br>39.406  | 0.0177 |
| TGFB3     | 1.517 | 0.692 , 3.329  | 0.2783 | 2.75  | 0.707 ,<br>10.690  | 0.1298 |
| THPO      | 5.708 | 1.414 , 23.039 | 0.0173 | 3.269 | 0.093 ,<br>114.838 | 0.4308 |
| TNF       | 0.728 | 0.180 , 2.939  | 0.6393 | 1.446 | 0.291 ,<br>7.182   | 0.6315 |
| TNFRSF11B | 1.134 | 0.149 , 8.626  | 0.8965 | 1.235 | 0.138 ,<br>11.080  | 0.8299 |
| TNFSF10   | 1.186 | 0.694 , 2.026  | 0.5156 | 1.616 | 0.697 ,<br>3.747   | 0.2322 |
| TNFSF11   | 1.194 | 0.418 , 3.416  | 0.7278 | 2.445 | 0.640 ,<br>9.343   | 0.1707 |
| TNFSF12   | 1.512 | 1.072 , 2.134  | 0.0211 | 0.791 | 0.259 ,<br>2.413   | 0.6406 |
| TNFSF13   | 1.346 | 0.841 , 2.154  | 0.203  | 1.462 | 0.579 ,<br>3.694   | 0.3576 |
| TNFSF13B  | 1.123 | 0.681 , 1.853  | 0.6337 | 2.041 | 0.942 ,<br>4.422   | 0.0666 |
| TNFSF14   | 2.18  | 1.061 , 4.477  | 0.0352 | 1.991 | 0.486 ,<br>8.149   | 0.3012 |
| TNFSF4    | 2.386 | 1.144 , 4.977  | 0.0232 | 2.768 | 1.055 ,<br>7.265   | 0.04   |

|        |       |               |        |       |                  |        |
|--------|-------|---------------|--------|-------|------------------|--------|
| TNFSF8 | 1.469 | 0.889 , 2.429 | 0.1251 | 1.882 | 0.923 ,<br>3.840 | 0.0771 |
| TXLNA  | 1.255 | 0.813 , 1.939 | 0.2881 | 1.305 | 0.724 ,<br>2.352 | 0.3468 |
| VEGFA  | 1.191 | 0.420 , 3.380 | 0.7269 | 1.647 | 0.659 ,<br>4.117 | 0.2574 |
