# Supplementary material for: Gene Expression Profile of Human Cytokines in Response to Burkholderia pseudomallei Infection
Source: PubMed Central journal article supplement (PMC5397567; doi:10.1128/msphere.00121-17), 2017-04-19
Supplement: sph002172268st9.pdf [file sph002172268st9.pdf]

**Table S9**

| <b>Gene Target</b> | <b>Relative Expression Ratio</b> | <b>Confidence Limit</b> | <b>P-Value</b> |
|--------------------|----------------------------------|-------------------------|----------------|
| ADIPOQ             | 5.346                            | 0.120 , 238.898         | 0.2979         |
| BMP1               | 1.002                            | 0.627 , 1.601           | 0.9944         |
| BMP2               | 1.302                            | 0.303 , 5.591           | 0.7049         |
| BMP3               | 1.395                            | 0.427 , 4.564           | 0.5642         |
| BMP4               | 0.426                            | 0.008 , 21.402          | 0.6187         |
| BMP5               | 0.092                            | <0.001 , 100.995        | 0.2350         |
| BMP6               | 0.980                            | 0.506 , 1.897           | 0.9496         |
| BMP7               | 3.452                            | 0.028 , 423.626         | 0.5819         |
| CD40LG             | 1.141                            | 0.596 , 2.184           | 0.6745         |
| CD70               | 1.126                            | 0.724 , 1.753           | 0.5675         |
| CNTF               | 2.111                            | 0.557 , 8.001           | 0.2582         |
| CSF1               | 1.695                            | 0.842 , 3.413           | 0.1311         |
| CSF2               | 2.802                            | 0.696 , 11.279          | 0.1384         |
| CSF3               | 1.995                            | 0.401 , 9.924           | 0.3749         |
| FAM3B              | 12.138                           | 2.487 , 59.237          | 0.0048         |
| FASLG              | 1.229                            | 0.522 , 2.890           | 0.6169         |
| FIGF               | 1.414                            | 0.318 , 6.279           | 0.6319         |
| GDF2               | 0.951                            | <0.001 , +Inf           | 0.9824         |
| GDF5               | 0.249                            | 0.002 , 35.238          | 0.4566         |
| GDF9               | 0.837                            | 0.265 , 2.645           | 0.7506         |
| IFNA1              | 0.788                            | 0.136 , 4.571           | 0.7760         |
| IFNA2              | 0.004                            | <0.001 , 0.967          | 0.0487         |
| IFNA4              | 0.453                            | 0.029 , 6.952           | 0.5193         |
| IFNA5              | 0.999                            | 0.066 , 15.048          | 0.9991         |
| IFNB1              | 2.459                            | 0.743 , 8.140           | 0.1322         |
| IFNG               | 2.269                            | 0.780 , 6.601           | 0.1253         |
| IL10               | 3.561                            | 1.098 , 11.543          | 0.0361         |
| IL11               | 1.518                            | 0.243 , 9.476           | 0.6129         |
| IL12A              | 1.030                            | 0.469 , 2.263           | 0.9356         |
| IL12B              | 1.526                            | 0.333 , 6.988           | 0.5668         |
| IL13               | 2.790                            | 0.741 , 10.501          | 0.1223         |
| IL15               | 1.233                            | 0.732 , 2.078           | 0.4060         |
| IL16               | 0.943                            | 0.600 , 1.481           | 0.7864         |
| IL17A              | 0.660                            | 0.003 , 144.868         | 0.8416         |
| IL17B              | 1.476                            | 0.360 , 6.050           | 0.5543         |
| IL17C              | 1.596                            | 0.428 , 5.951           | 0.4609         |
| IL18               | 0.955                            | 0.584 , 1.561           | 0.8445         |
| IL19               | 1.767                            | 0.368 , 8.486           | 0.4443         |
| IL1A               | 0.654                            | 0.117 , 3.667           | 0.6107         |
| IL1B               | 2.273                            | 0.481 , 10.738          | 0.2782         |
| IL1RN              | 1.240                            | 0.556 , 2.765           | 0.5822         |

|           |       |                 |        |
|-----------|-------|-----------------|--------|
| IL2       | 0.945 | 0.382 , 2.335   | 0.8962 |
| IL20      | 0.830 | 0.220 , 3.131   | 0.7720 |
| IL21      | 1.266 | 0.330 , 4.862   | 0.7195 |
| IL22      | 2.454 | 0.764 , 7.880   | 0.1226 |
| IL23A     | 1.921 | 0.882 , 4.185   | 0.0961 |
| IL24      | 1.838 | 0.480 , 7.042   | 0.3419 |
| IL25      | 2.671 | 0.189 , 37.714  | 0.3946 |
| IL27      | 1.586 | 0.371 , 6.782   | 0.5173 |
| IL3       | 0.075 | 0.002 , 3.188   | 0.1456 |
| IL4       | 6.345 | 0.500 , 80.440  | 0.1448 |
| IL5       | 2.678 | 0.796 , 9.004   | 0.1038 |
| IL6       | 3.307 | 1.278 , 8.560   | 0.0163 |
| IL7       | 1.839 | 0.801 , 4.226   | 0.1429 |
| IL8       | 4.170 | 0.992 , 17.522  | 0.0511 |
| IL9       | 0.506 | 0.173 , 1.475   | 0.1813 |
| INHA      | 1.944 | <0.001 , +Inf   | 0.7413 |
| INHBA     | 1.472 | 0.292 , 7.417   | 0.6099 |
| LEFTY2    | 1.575 | 0.534 , 4.643   | 0.3853 |
| LIF       | 1.475 | 0.219 , 9.951   | 0.6615 |
| LTA       | 1.240 | 0.547 , 2.810   | 0.5917 |
| LTB       | 1.095 | 0.511 , 2.348   | 0.8023 |
| MSTN      | 1.195 | 0.246 , 5.812   | 0.8168 |
| NODAL     | 1.616 | 0.851 , 3.069   | 0.1334 |
| OSM       | 2.346 | 0.705 , 7.801   | 0.1514 |
| PDGFA     | 1.221 | 0.568 , 2.626   | 0.5925 |
| SPP1      | 0.927 | 0.155 , 5.559   | 0.9307 |
| TGFA      | 2.591 | 0.978 , 6.860   | 0.0548 |
| TGFB1     | 1.146 | 0.514 , 2.557   | 0.7197 |
| TGFB2     | 1.847 | 0.647 , 5.273   | 0.2374 |
| TGFB3     | 1.280 | 0.533 , 3.071   | 0.5608 |
| THPO      | 4.537 | 0.058 , 357.591 | 0.3820 |
| TNF       | 0.943 | 0.236 , 3.764   | 0.9286 |
| TNFRSF11B | 9.277 | 0.480 , 179.439 | 0.1172 |
| TNFSF10   | 0.702 | 0.382 , 1.290   | 0.2410 |
| TNFSF11   | 2.649 | 0.715 , 9.813   | 0.1350 |
| TNFSF12   | 0.712 | 0.399 , 1.270   | 0.2374 |
| TNFSF13   | 1.391 | 0.741 , 2.610   | 0.2835 |
| TNFSF13B  | 0.893 | 0.432 , 1.848   | 0.7454 |
| TNFSF14   | 0.861 | 0.344 , 2.154   | 0.7357 |
| TNFSF4    | 1.356 | 0.682 , 2.696   | 0.3618 |
| TNFSF8    | 1.424 | 0.977 , 2.075   | 0.0648 |
| TXLNA     | 1.072 | 0.638 , 1.801   | 0.7776 |
| VEGFA     | 2.973 | 1.177 , 7.513   | 0.0235 |
